## Corrections

*Correction: The new world of inorganic polyphosphates*

Cristina Azevedo and Adolfo Saiardi

Volume 44 (1), pp 13-17

The wrong version of Figure 1 was published in this article; the correct version is presented here. In the original Figure 1 the phosphoramidate was improperly represented with a phosphate linked to the oxygen group. The correct bond is P-N.

### Figure 1 | Model of two independent PTMs, serine-pyrophosphorylation and lysine-polyphosphorylation

Protein pyrophosphorylation is the transfer of the  $\beta$ -phosphate group of the pyrophosphate moiety of IP7 on to a pre-phosphorylated serine residue (left) [16,17]. Conversely, protein polyphosphorylation is the covalent attachment of a chain of inorganic polyP on to a lysine residue dependent on the hydrolysis of an internal phosphate ester linkage (right) [1].

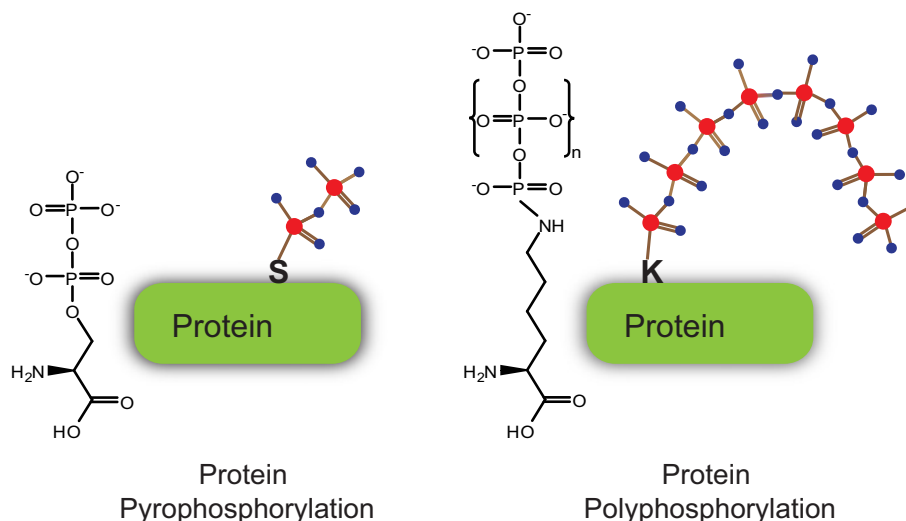

*Correction: Peroxisome protein import: a complex journey*

Alison Baker, Thomas Lanyon-Hogg and Stuart L. Warriner

Volume 44 (3), pp 783-789

In the published article, the second author's surname was presented incorrectly as "Thomas Lanyon Hogg". This author's surname should be hyphenated, i.e. "Thomas Lanyon-Hogg".
